# Supplementary material
Source: publisher site journal article supplement (https://www.dovepress.com/article/541016)
Supplement: Supplementary file 1 [file 541016%20Supplementary%20Material.docx]

**ImageJ Macro1: Interactive 3D Surface Plot Generation**

// Purpose: Standardize grayscale range and generate 3D surface plot

// Step 1: Convert image to 8-bit grayscale

run("8-bit");

// Step 2: Normalize grayscale range (ensure consistent scale across all samples)

setMinAndMax(0, 255);

// Step 3: Generate 3D surface plot with standard parameters

run("Interactive 3D Surface Plot",

"gridsize=256 smoothing=5 zscale=1 autoscale angle=45");

**ImageJ Macro2: Black Region Quantification**

// Purpose: Quantify black-stained area in binary images

// Step 1: Convert image to 8-bit grayscale

run("8-bit");

// Step 2: Apply threshold to define black-stained area (gray value between 0 and 60)

setAutoThreshold("Default");

setThreshold(0, 60);

// Step 3: Convert to binary mask (black = positive signal, white = background)

run("Convert to Mask");

// Step 4: Set measurement parameters (area, mean, min gray within threshold)

run("Set Measurements...", "area mean min redirect=None decimal=3 limit");

// Step 5: Analyze particles within mask and summarize results

run("Analyze Particles...", "display summarize");
